# Supplementary material for: Integrative Analysis of miRNAs Involved in Fat Deposition in Different Pig Breeds
Source: MDPI journal article supplement (doi:10.3390/genes14010094), 2022-12-28
Supplement: s1 [file s1]

Table S9: The genes regulated by various miRNAs and the differential expression status of the miRNAs.

| Gene name                                          | Gene   | Targeting miRNA | Up/Downregulated |
|----------------------------------------------------|--------|-----------------|------------------|
| carnitine<br>palmitoyltransferase<br>1A            | CPT1A  | ssc-miR-455-3p  | Down             |
|                                                    |        | ssc-miR-27b-3p  | Down             |
|                                                    |        | ssc-miR-133a-3p | Up               |
| StAR-related lipid<br>transfer domain<br>protein 3 | STARD3 | ssc-miR-1285    | Down             |
|                                                    |        | ssc-miR-874     | Up               |
|                                                    |        | ssc-let-7i      | Down             |
| Hexosaminidase A                                   | HEXA   | ssc-miR-122     | Up               |
|                                                    |        | ssc-miR-486     | Up               |
| Dickkopf-related<br>protein 3                      | DKK3   | ssc-miR-1285    | Down             |
|                                                    |        | ssc-miR-455-3p  | Down             |
|                                                    |        | ssc-miR-411     | Down             |
| Monoacylglycerol<br>lipas                          | MGLL   | ssc-miR-331-3p  | Up               |
|                                                    |        | ssc-miR-874     | Up               |
|                                                    |        | ssc-let-7i      | Down             |
| stearoyl-CoA<br>desaturase                         | SCD    | ssc-miR-1       | Up               |
|                                                    |        | ssc-miR-122     | Up               |
| stearoyl-CoA<br>desaturase 5                       | SCD5   | ssc-miR-486     | Up               |
|                                                    |        | ssc-miR-128     | Up               |
